# Supplementary material for: Differential Transcriptome Analysis between Paulownia fortunei and Its Synthesized Autopolyploid
Source: PubMed Central journal article supplement (PMC3975441; doi:10.3390/ijms15035079), 2014-03-21
Supplement: ijms-15-05079-s001.pdf [file ijms-15-05079-s001.pdf]

## Supplementary Information

**Table S1.** KEGG pathways represented in *P. fortunei* transcripts.

| <b>Pathway entry</b> | <b>Pathway name</b>                          | <b>No. of terms</b> | <b>No. of transcripts</b> |
|----------------------|----------------------------------------------|---------------------|---------------------------|
| map01100             | Metabolic pathways                           | 418                 | 1413                      |
| map01110             | Biosynthesis of secondary metabolites        | 208                 | 735                       |
| map01120             | Microbial metabolism in diverse environments | 85                  | 394                       |
| map03013             | RNA transport                                | 54                  | 185                       |
| map03040             | Spliceosome                                  | 50                  | 157                       |
| map04141             | Protein processing in endoplasmic reticulum  | 46                  | 159                       |
| map00230             | Purine metabolism                            | 45                  | 135                       |
| map00240             | Pyrimidine metabolism                        | 39                  | 78                        |
| map03008             | Ribosome biogenesis in eukaryotes            | 38                  | 141                       |
| map05169             | Epstein-Barr virus infection                 | 37                  | 99                        |
| map04110             | Cell cycle                                   | 36                  | 114                       |
| map04111             | Cell cycle—yeast                             | 36                  | 100                       |
| map04120             | Ubiquitin mediated proteolysis               | 35                  | 121                       |
| map03010             | Ribosome                                     | 35                  | 73                        |
| map03015             | mRNA surveillance pathway                    | 33                  | 139                       |
| map04075             | Plant hormone signal transduction            | 30                  | 127                       |
| map00520             | Amino sugar and nucleotide sugar metabolism  | 27                  | 95                        |
| map04113             | Meiosis—yeast                                | 27                  | 78                        |
| map03018             | RNA degradation                              | 26                  | 121                       |
| map00500             | Starch and sucrose metabolism                | 25                  | 148                       |
| map00010             | Glycolysis/Gluconeogenesis                   | 24                  | 156                       |
| map05016             | Huntington's disease                         | 24                  | 74                        |
| map05166             | HTLV-I infection                             | 23                  | 72                        |
| map04626             | Plant-pathogen interaction                   | 22                  | 71                        |
| map03420             | Nucleotide excision repair                   | 22                  | 62                        |
| map00620             | Pyruvate metabolism                          | 21                  | 118                       |

**Table S1. Cont.**

| <b>Pathway entry</b> | <b>Pathway name</b>                         | <b>No. of terms</b> | <b>No. of transcripts</b> |
|----------------------|---------------------------------------------|---------------------|---------------------------|
| map05203             | Viral carcinogenesis                        | 21                  | 93                        |
| map04114             | Oocyte meiosis                              | 21                  | 83                        |
| map00190             | Oxidative phosphorylation                   | 21                  | 78                        |
| map04146             | Peroxisome                                  | 21                  | 77                        |
| map00710             | Carbon fixation in photosynthetic organisms | 20                  | 111                       |
| map00970             | Aminoacyl-tRNA biosynthesis                 | 20                  | 92                        |
| map00564             | Glycerophospholipid metabolism              | 20                  | 59                        |
| map00250             | Alanine, aspartate and glutamate metabolism | 20                  | 57                        |
| map00270             | Cysteine and methionine metabolism          | 19                  | 79                        |
| map04144             | Endocytosis                                 | 19                  | 75                        |
| map04142             | Lysosome                                    | 19                  | 74                        |
| map03050             | Proteasome                                  | 19                  | 42                        |
| map03030             | DNA replication                             | 19                  | 41                        |
| map00860             | Porphyrin and chlorophyll metabolism        | 19                  | 39                        |
| map05200             | Pathways in cancer                          | 18                  | 87                        |
| map00680             | Methane metabolism                          | 18                  | 79                        |
| map03460             | Fanconi anemia pathway                      | 18                  | 69                        |
| map04145             | Phagosome                                   | 18                  | 62                        |
| map00330             | Arginine and proline metabolism             | 18                  | 57                        |
| map04151             | PI3K-Akt signaling pathway                  | 17                  | 73                        |
| map04910             | Insulin signaling pathway                   | 16                  | 66                        |
| map00260             | Glycine, serine and threonine metabolism    | 16                  | 48                        |
| map03440             | Homologous recombination                    | 15                  | 65                        |
| map00630             | Glyoxylate and dicarboxylate metabolism     | 15                  | 64                        |
| map05152             | Tuberculosis                                | 15                  | 53                        |
| map05010             | Alzheimer's disease                         | 15                  | 39                        |
| map00562             | Inositol phosphate metabolism               | 14                  | 66                        |
| map04914             | Progesterone-mediated oocyte maturation     | 14                  | 56                        |
| map04721             | Synaptic vesicle cycle                      | 14                  | 54                        |
| map00510             | N-Glycan biosynthesis                       | 14                  | 46                        |
| map05164             | Influenza A                                 | 14                  | 44                        |
| map03022             | Basal transcription factors                 | 14                  | 34                        |
| map00020             | Citrate cycle (TCA cycle)                   | 13                  | 68                        |
| map01210             | 2-Oxocarboxylic acid metabolism             | 13                  | 60                        |

Table S1. Cont.

| Pathway entry | Pathway name                                        | No. of terms | No. of transcripts |
|---------------|-----------------------------------------------------|--------------|--------------------|
| map04070      | Phosphatidylinositol signaling system               | 13           | 54                 |
| map00051      | Fructose and mannose metabolism                     | 13           | 53                 |
| map05168      | Herpes simplex infection                            | 13           | 48                 |
| map00280      | Valine, leucine and isoleucine degradation          | 13           | 45                 |
| map00561      | Glycerolipid metabolism                             | 13           | 44                 |
| map00480      | Glutathione metabolism                              | 13           | 43                 |
| map03430      | Mismatch repair                                     | 13           | 41                 |
| map00900      | Terpenoid backbone biosynthesis                     | 13           | 36                 |
| map00195      | Photosynthesis                                      | 13           | 29                 |
| map03410      | Base excision repair                                | 13           | 24                 |
| map04310      | Wnt signaling pathway                               | 12           | 63                 |
| map00030      | Pentose phosphate pathway                           | 12           | 61                 |
| map04810      | Regulation of actin cytoskeleton                    | 12           | 49                 |
| map00940      | Phenylpropanoid biosynthesis                        | 12           | 44                 |
| map00400      | Phenylalanine, tyrosine and tryptophan biosynthesis | 12           | 42                 |
| map05012      | Parkinson's disease                                 | 12           | 31                 |
| map03020      | RNA polymerase                                      | 12           | 24                 |
| map00052      | Galactose metabolism                                | 11           | 52                 |
| map00640      | Propanoate metabolism                               | 11           | 39                 |
| map00910      | Nitrogen metabolism                                 | 11           | 30                 |
| map00410      | beta-Alanine metabolism                             | 11           | 30                 |
| map00906      | Carotenoid biosynthesis                             | 11           | 29                 |
| map00053      | Ascorbate and aldarate metabolism                   | 11           | 26                 |
| map04066      | HIF-1 signaling pathway                             | 10           | 56                 |
| map00720      | Carbon fixation pathways in prokaryotes             | 10           | 41                 |
| map00071      | Fatty acid metabolism                               | 10           | 40                 |
| map05034      | Alcoholism                                          | 10           | 34                 |
| map03060      | Protein export                                      | 10           | 27                 |
| map05161      | Hepatitis B                                         | 9            | 39                 |
| map04666      | Fc gamma R-mediated phagocytosis                    | 9            | 39                 |
| map00040      | Pentose and glucuronate interconversions            | 9            | 39                 |
| map04712      | Circadian rhythm—plant                              | 9            | 37                 |
| map00360      | Phenylalanine metabolism                            | 9            | 31                 |

Table S1. Cont.

| Pathway entry | Pathway name                                                      | No. of terms | No. of transcripts |
|---------------|-------------------------------------------------------------------|--------------|--------------------|
| map05120      | Epithelial cell signaling in <i>Helicobacter pylori</i> infection | 9            | 30                 |
| map05110      | <i>Vibrio cholerae</i> infection                                  | 9            | 30                 |
| map04115      | p53 signaling pathway                                             | 9            | 30                 |
| map00770      | Pantothenate and CoA biosynthesis                                 | 9            | 27                 |
| map00350      | Tyrosine metabolism                                               | 9            | 25                 |
| map04728      | Dopaminergic synapse                                              | 8            | 37                 |
| map00513      | Various types of <i>N</i> -glycan biosynthesis                    | 8            | 34                 |
| map00592      | alpha-Linolenic acid metabolism                                   | 8            | 33                 |
| map05210      | Colorectal cancer                                                 | 8            | 30                 |
| map05323      | Rheumatoid arthritis                                              | 8            | 29                 |
| map00600      | Sphingolipid metabolism                                           | 8            | 26                 |
| map05134      | Legionellosis                                                     | 8            | 23                 |
| map00061      | Fatty acid biosynthesis                                           | 8            | 19                 |
| map04722      | Neurotrophin signaling pathway                                    | 8            | 18                 |
| map04130      | SNARE interactions in vesicular transport                         | 8            | 18                 |
| map00130      | Ubiquinone and other terpenoid-quinone biosynthesis               | 8            | 18                 |
| map01040      | Biosynthesis of unsaturated fatty acids                           | 8            | 17                 |
| map00563      | Glycosylphosphatidylinositol(GPI)-anchor biosynthesis             | 8            | 17                 |
| map05215      | Prostate cancer                                                   | 7            | 35                 |
| map04530      | Tight junction                                                    | 7            | 35                 |
| map04150      | mTOR signaling pathway                                            | 7            | 32                 |
| map04966      | Collecting duct acid secretion                                    | 7            | 27                 |
| map00650      | Butanoate metabolism                                              | 7            | 27                 |
| map00460      | Cyanoamino acid metabolism                                        | 7            | 26                 |
| map04612      | Antigen processing and presentation                               | 7            | 25                 |
| map05131      | Shigellosis                                                       | 7            | 18                 |
| map00983      | Drug metabolism—other enzymes                                     | 7            | 15                 |
| map05202      | Transcriptional misregulation in cancer                           | 6            | 35                 |
| map05160      | Hepatitis C                                                       | 6            | 35                 |
| map04350      | TGF-beta signaling pathway                                        | 6            | 35                 |
| map00920      | Sulfur metabolism                                                 | 6            | 31                 |
| map04720      | Long-term potentiation                                            | 6            | 27                 |

Table S1. Cont.

| Pathway entry | Pathway name                                | No. of terms | No. of transcripts |
|---------------|---------------------------------------------|--------------|--------------------|
| map00450      | Selenocompound metabolism                   | 6            | 27                 |
| map04010      | MAPK signaling pathway                      | 6            | 26                 |
| map00670      | One carbon pool by folate                   | 6            | 23                 |
| map05142      | Chagas disease (American trypanosomiasis)   | 6            | 22                 |
| map00290      | Valine, leucine and isoleucine biosynthesis | 6            | 22                 |
| map03320      | PPAR signaling pathway                      | 6            | 21                 |
| map04920      | Adipocytokine signaling pathway             | 6            | 19                 |
| map00790      | Folate biosynthesis                         | 6            | 19                 |
| map00300      | Lysine biosynthesis                         | 6            | 17                 |
| map00380      | Tryptophan metabolism                       | 6            | 16                 |
| map00780      | Biotin metabolism                           | 6            | 14                 |
| map05132      | Salmonella infection                        | 6            | 13                 |
| map00340      | Histidine metabolism                        | 6            | 13                 |
| map05100      | Bacterial invasion of epithelial cells      | 6            | 12                 |
| map04122      | Sulfur relay system                         | 6            | 11                 |
| map00196      | Photosynthesis—antenna proteins             | 6            | 10                 |
| map05145      | Toxoplasmosis                               | 5            | 30                 |
| map04724      | Glutamatergic synapse                       | 5            | 29                 |
| map05020      | Prion diseases                              | 5            | 21                 |
| map04020      | Calcium signaling pathway                   | 5            | 21                 |
| map00511      | Other glycan degradation                    | 5            | 21                 |
| map05214      | Glioma                                      | 5            | 19                 |
| map04710      | Circadian rhythm                            | 5            | 19                 |
| map05211      | Renal cell carcinoma                        | 5            | 18                 |
| map05130      | Pathogenic Escherichia coli infection       | 5            | 18                 |
| map04510      | Focal adhesion                              | 5            | 18                 |
| map04391      | Hippo signaling pathway—fly                 | 5            | 16                 |
| map05162      | Measles                                     | 5            | 15                 |
| map04727      | GABAergic synapse                           | 5            | 15                 |
| map03450      | Non-homologous end-joining                  | 5            | 15                 |
| map05014      | Amyotrophic lateral sclerosis (ALS)         | 5            | 14                 |
| map04140      | Regulation of autophagy                     | 5            | 14                 |
| map04270      | Vascular smooth muscle contraction          | 5            | 13                 |
| map00310      | Lysine degradation                          | 5            | 13                 |

Table S1. Cont.

| Pathway entry | Pathway name                                           | No. of terms | No. of transcripts |
|---------------|--------------------------------------------------------|--------------|--------------------|
| map00960      | Tropane, piperidine and pyridine alkaloid biosynthesis | 5            | 10                 |
| map04623      | Cytosolic DNA-sensing pathway                          | 5            | 7                  |
| map00760      | Nicotinate and nicotinamide metabolism                 | 5            | 7                  |
| map04930      | Type II diabetes mellitus                              | 4            | 42                 |
| map05213      | Endometrial cancer                                     | 4            | 22                 |
| map05212      | Pancreatic cancer                                      | 4            | 21                 |
| map04912      | GnRH signaling pathway                                 | 4            | 21                 |
| map04540      | Gap junction                                           | 4            | 20                 |
| map04520      | Adherens junction                                      | 4            | 19                 |
| map04330      | Notch signaling pathway                                | 4            | 19                 |
| map04730      | Long-term depression                                   | 4            | 18                 |
| map00565      | Ether lipid metabolism                                 | 4            | 18                 |
| map04916      | Melanogenesis                                          | 4            | 17                 |
| map04662      | B cell receptor signaling pathway                      | 4            | 16                 |
| map04650      | Natural killer cell mediated cytotoxicity              | 4            | 16                 |
| map04380      | Osteoclast differentiation                             | 4            | 16                 |
| map04370      | VEGF signaling pathway                                 | 4            | 16                 |
| map04360      | Axon guidance                                          | 4            | 16                 |
| map03070      | Bacterial secretion system                             | 4            | 15                 |
| map04210      | Apoptosis                                              | 4            | 14                 |
| map04112      | Cell cycle—Caulobacter                                 | 4            | 13                 |
| map00945      | Stilbenoid, diarylheptanoid and gingerol biosynthesis  | 4            | 11                 |
| map00941      | Flavonoid biosynthesis                                 | 4            | 11                 |
| map05133      | Pertussis                                              | 4            | 10                 |
| map04620      | Toll-like receptor signaling pathway                   | 4            | 10                 |
| map04062      | Chemokine signaling pathway                            | 4            | 10                 |
| map00750      | Vitamin B6 metabolism                                  | 4            | 9                  |
| map02020      | Two-component system                                   | 4            | 8                  |
| map00950      | Isoquinoline alkaloid biosynthesis                     | 4            | 8                  |
| map00100      | Steroid biosynthesis                                   | 4            | 8                  |
| map00904      | Diterpenoid biosynthesis                               | 4            | 6                  |
| map00740      | Riboflavin metabolism                                  | 3            | 22                 |

**Table S1. Cont.**

| <b>Pathway entry</b> | <b>Pathway name</b>                                       | <b>No. of terms</b> | <b>No. of transcripts</b> |
|----------------------|-----------------------------------------------------------|---------------------|---------------------------|
| map00521             | Streptomycin biosynthesis                                 | 3                   | 19                        |
| map05216             | Thyroid cancer                                            | 3                   | 17                        |
| map00625             | Chloroalkane and chloroalkene degradation                 | 3                   | 17                        |
| map04723             | Retrograde endocannabinoid signaling                      | 3                   | 16                        |
| map04621             | NOD-like receptor signaling pathway                       | 3                   | 16                        |
| map04660             | T cell receptor signaling pathway                         | 3                   | 15                        |
| map00830             | Retinol metabolism                                        | 3                   | 15                        |
| map00540             | Lipopolysaccharide biosynthesis                           | 3                   | 15                        |
| map05218             | Melanoma                                                  | 3                   | 14                        |
| map05140             | Leishmaniasis                                             | 3                   | 14                        |
| map00982             | Drug metabolism—cytochrome P450                           | 3                   | 14                        |
| map00980             | Metabolism of xenobiotics by cytochrome P450              | 3                   | 14                        |
| map05220             | Chronic myeloid leukemia                                  | 3                   | 13                        |
| map04961             | Endocrine and other factor-regulated calcium reabsorption | 3                   | 13                        |
| map00072             | Synthesis and degradation of ketone bodies                | 3                   | 13                        |
| map05322             | Systemic lupus erythematosus                              | 3                   | 12                        |
| map05221             | Acute myeloid leukemia                                    | 3                   | 12                        |
| map04012             | ErbB signaling pathway                                    | 3                   | 12                        |
| map00730             | Thiamine metabolism                                       | 3                   | 12                        |
| map05031             | Amphetamine addiction                                     | 3                   | 11                        |
| map04622             | RIG-I-like receptor signaling pathway                     | 3                   | 11                        |
| map00908             | Zeatin biosynthesis                                       | 3                   | 10                        |
| map04726             | Serotonergic synapse                                      | 3                   | 9                         |
| map04725             | Cholinergic synapse                                       | 3                   | 9                         |
| map04713             | Circadian entrainment                                     | 3                   | 9                         |
| map04664             | Fc epsilon RI signaling pathway                           | 3                   | 9                         |
| map04064             | NF-kappa B signaling pathway                              | 3                   | 9                         |
| map00590             | Arachidonic acid metabolism                               | 3                   | 9                         |
| map05416             | Viral myocarditis                                         | 3                   | 8                         |
| map00531             | Glycosaminoglycan degradation                             | 3                   | 7                         |
| map00430             | Taurine and hypotaurine metabolism                        | 3                   | 6                         |
| map00401             | Novobiocin biosynthesis                                   | 3                   | 6                         |
| map05410             | Hypertrophic cardiomyopathy (HCM)                         | 3                   | 5                         |
| map00905             | Brassinosteroid biosynthesis                              | 3                   | 4                         |

**Table S1. Cont.**

| Pathway entry | Pathway name                                | No. of terms | No. of transcripts |
|---------------|---------------------------------------------|--------------|--------------------|
| map00062      | Fatty acid elongation                       | 3            | 4                  |
| map04260      | Cardiac muscle contraction                  | 3            | 3                  |
| map00591      | Linoleic acid metabolism                    | 2            | 23                 |
| map04614      | Renin-angiotensin system                    | 2            | 13                 |
| map00626      | Naphthalene degradation                     | 2            | 13                 |
| map04011      | MAPK signaling pathway—yeast                | 2            | 12                 |
| map00603      | Glycosphingolipid biosynthesis—globo series | 2            | 11                 |
| map00660      | C5-Branched dibasic acid metabolism         | 2            | 10                 |
| map00253      | Tetracycline biosynthesis                   | 2            | 5                  |
| map00785      | Lipoic acid metabolism                      | 2            | 6                  |

**Table S2.** Transcripts involved in the KOG main category “information storage and processing”.

| Transcript ID                                       | Log <sub>2</sub> fold change | KOG number | Description                                                                                  | KOG classification | E value               |
|-----------------------------------------------------|------------------------------|------------|----------------------------------------------------------------------------------------------|--------------------|-----------------------|
| [J] Translation, ribosomal structure and biogenesis |                              |            |                                                                                              |                    |                       |
| m.28330                                             | 6.25                         | KOG0462    | Elongation factor-type GTP-binding protein                                                   | [J]                | $2.0 \times 10^{-17}$ |
| m.10084                                             | 6.07                         | KOG1728    | 40S ribosomal protein S11                                                                    | [J]                | $3.0 \times 10^{-19}$ |
| m.57095                                             | 5.93                         | KOG1224    | Para-aminobenzoate (PABA) synthase ABZ1                                                      | [J]                | $4.0 \times 10^{-28}$ |
| m.28883                                             | 5.52                         | KOG1637    | Threonyl-tRNA synthetase                                                                     | [J]                | $1.0 \times 10^{-25}$ |
| m.48494                                             | 5.46                         | KOG2335    | tRNA-dihydrouridine synthase                                                                 | [J]                | $3.0 \times 10^{-7}$  |
| m.58413                                             | 4.84                         | KOG0328    | Predicted ATP-dependent RNA helicase FAL1, involved in rRNA maturation, DEAD-box superfamily | [J]                | $9.0 \times 10^{-6}$  |
| m.19713                                             | 4.75                         | KOG0187    | 40S ribosomal protein S17                                                                    | [J]                | $1.0 \times 10^{-7}$  |
| m.51317                                             | 4.74                         | KOG0433    | Isoleucyl-tRNA synthetase                                                                    | [J]                | $1.0 \times 10^{-6}$  |
| m.37662                                             | 4.57                         | KOG1247    | Methionyl-tRNA synthetase                                                                    | [J]                | $2.0 \times 10^{-12}$ |
| m.44666                                             | 4.41                         | KOG1033    | eIF-2alpha kinase PEK/EIF2AK3                                                                | [J]                | $1.0 \times 10^{-18}$ |
| m.33398                                             | 4.32                         | KOG2311    | NAD/FAD-utilizing protein possibly involved in translation                                   | [J]                | $7.0 \times 10^{-27}$ |
| m.19718                                             | 4.19                         | KOG0187    | 40S ribosomal protein S17                                                                    | [J]                | $1.0 \times 10^{-7}$  |
| m.53804                                             | 3.39                         | KOG1041    | Translation initiation factor 2C (eIF-2C) and related proteins                               | [J]                | $6.0 \times 10^{-6}$  |
| m.9057                                              | -2.63                        | KOG3203    | Mitochondrial/chloroplast ribosomal protein L13                                              | [J]                | $5.0 \times 10^{-23}$ |



Table S2. Cont.

| Transcript ID                       | Log <sub>2</sub> fold change | KOG number | Description                                                          | KOG classification | E value               |
|-------------------------------------|------------------------------|------------|----------------------------------------------------------------------|--------------------|-----------------------|
| m.16305                             | -2.67                        | KOG0846    | Mitochondrial/chloroplast ribosomal protein L15/L10                  | [J]                | $2.0 \times 10^{-42}$ |
| m.7824                              | -2.86                        | KOG0408    | Mitochondrial/chloroplast ribosomal protein S11                      | [J]                | $3.0 \times 10^{-9}$  |
| m.16388                             | -3.20                        | KOG3184    | 60S ribosomal protein L7                                             | [J]                | $2.0 \times 10^{-6}$  |
| m.10083                             | -3.79                        | KOG1728    | 40S ribosomal protein S11                                            | [J]                | $3.0 \times 10^{-19}$ |
| m.49382                             | -4.35                        | KOG1885    | Lysyl-tRNA synthetase (class II)                                     | [J]                | $4.0 \times 10^{-6}$  |
| m.33399                             | -4.39                        | KOG2311    | NAD/FAD-utilizing protein possibly involved in translation           | [J]                | $7.0 \times 10^{-27}$ |
| m.44669                             | -4.44                        | KOG1033    | eIF-2alpha kinase PEK/EIF2AK3                                        | [J]                | $1.0 \times 10^{-18}$ |
| m.26432                             | -4.52                        | KOG1191    | Mitochondrial GTPase                                                 | [J]                | $1.0 \times 10^{-49}$ |
| m.15618                             | -4.52                        | KOG1211    | Amidases                                                             | [J]                | $5.0 \times 10^{-18}$ |
| m.26182                             | -4.58                        | KOG0462    | Elongation factor-type GTP-binding protein                           | [J]                | $1.0 \times 10^{-13}$ |
| m.8736                              | -4.65                        | KOG4600    | Mitochondrial ribosomal protein MRP7 (L2)                            | [J]                | $2.0 \times 10^{-13}$ |
| m.26429                             | -4.68                        | KOG1191    | Mitochondrial GTPase                                                 | [J]                | $3.0 \times 10^{-51}$ |
| m.28181                             | -4.80                        | KOG0462    | Elongation factor-type GTP-binding protein                           | [J]                | $3.0 \times 10^{-19}$ |
| m.26436                             | -5.08                        | KOG1191    | Mitochondrial GTPase                                                 | [J]                | $2.0 \times 10^{-51}$ |
| m.34852                             | -5.13                        | KOG2509    | Seryl-tRNA synthetase                                                | [J]                | $1.0 \times 10^{-15}$ |
| m.28331                             | -5.15                        | KOG0462    | Elongation factor-type GTP-binding protein                           | [J]                | $2.0 \times 10^{-17}$ |
| m.38370                             | -5.44                        | KOG1076    | Translation initiation factor 3, subunit c (eIF-3c)                  | [J]                | $3.0 \times 10^{-34}$ |
| m.15209                             | -5.99                        | KOG0875    | 60S ribosomal protein L5                                             | [J]                | $4.0 \times 10^{-6}$  |
| m.28882                             | -6.11                        | KOG1637    | Threonyl-tRNA synthetase                                             | [J]                | $1.0 \times 10^{-25}$ |
| m.38372                             | -6.20                        | KOG1076    | Translation initiation factor 3, subunit c (eIF-3c)                  | [J]                | $3.0 \times 10^{-34}$ |
| m.50775                             | -6.34                        | KOG1145    | Mitochondrial translation initiation factor 2 (IF-2; GTPase)         | [J]                | $3.0 \times 10^{-7}$  |
| m.10667                             | 4.12                         | KOG0148    | Apoptosis-promoting RNA-binding protein TIA-1/TIAR (RRM superfamily) | [AJ]               | $7.0 \times 10^{-6}$  |
| m.48610                             | -4.71                        | KOG0123    | Polyadenylate-binding protein (RRM superfamily)                      | [AJ]               | $7.0 \times 10^{-6}$  |
| [A] RNA processing and modification |                              |            |                                                                      |                    |                       |
| m.46179                             | 4.99                         | KOG2190    | PolyC-binding proteins alphaCP-1 and related KH domain proteins      | [AR]               | $1.0 \times 10^{-6}$  |
| m.53079                             | 4.66                         | KOG2190    | PolyC-binding proteins alphaCP-1 and related KH domain proteins      | [AR]               | $5.0 \times 10^{-7}$  |
| m.46175                             | -4.81                        | KOG2190    | PolyC-binding proteins alphaCP-1 and related KH domain proteins      | [AR]               | $1.0 \times 10^{-6}$  |

Table S2. Cont.

| Transcript ID | Log <sub>2</sub> fold change | KOG number | Description                                                          | KOG classification | E value               |
|---------------|------------------------------|------------|----------------------------------------------------------------------|--------------------|-----------------------|
| m.46178       | -5.32                        | KOG2190    | PolyC-binding proteins alphaCP-1 and related KH domain proteins      | [AR]               | $1.0 \times 10^{-6}$  |
| m.10667       | 4.12                         | KOG0148    | Apoptosis-promoting RNA-binding protein TIA-1/TIAR (RRM superfamily) | [AJ]               | $7.0 \times 10^{-6}$  |
| m.48610       | -4.71                        | KOG0123    | Polyadenylate-binding protein (RRM superfamily)                      | [AJ]               | $7.0 \times 10^{-6}$  |
| m.57416       | 5.86                         | KOG0007    | Splicing factor 3a, subunit 1                                        | [A]                | $8.0 \times 10^{-7}$  |
| m.57719       | 5.66                         | KOG1795    | U5 snRNP spliceosome subunit                                         | [A]                | $3.0 \times 10^{-14}$ |
| m.48682       | 5.54                         | KOG4211    | Splicing factor hnRNP-F and related RNA-binding proteins             | [A]                | $1.0 \times 10^{-20}$ |
| m.50750       | 5.50                         | KOG0948    | Nuclear exosomal RNA helicase MTR4, DEAD-box superfamily             | [A]                | $3.0 \times 10^{-8}$  |
| m.59847       | 5.21                         | KOG1070    | rRNA processing protein Rrp5                                         | [A]                | $1.0 \times 10^{-9}$  |
| m.28492       | 5.21                         | KOG0839    | RNA Methylase, SpoU family                                           | [A]                | $2.0 \times 10^{-53}$ |
| m.38309       | 5.10                         | KOG2636    | Splicing factor 3a, subunit 3                                        | [A]                | $2.0 \times 10^{-10}$ |
| m.29695       | 5.09                         | KOG0335    | ATP-dependent RNA helicase                                           | [A]                | $3.0 \times 10^{-6}$  |
| m.56203       | 5.02                         | KOG2098    | Predicted N6-adenine RNA methylase                                   | [A]                | $2.0 \times 10^{-10}$ |
| m.14486       | 4.98                         | KOG1801    | tRNA-splicing endonuclease positive effector (SEN1)                  | [A]                | $6.0 \times 10^{-6}$  |
| m.47208       | 4.88                         | KOG0120    | Splicing factor U2AF, large subunit (RRM superfamily)                | [A]                | $2.0 \times 10^{-6}$  |
| m.53303       | 4.83                         | KOG1898    | Splicing factor 3b, subunit 3                                        | [A]                | $1.0 \times 10^{-59}$ |
| m.57469       | 4.82                         | KOG0951    | RNA helicase BRR2, DEAD-box superfamily                              | [A]                | $4.0 \times 10^{-11}$ |
| m.53500       | 4.63                         | KOG1960    | Predicted RNA-binding protein, contains KH domains                   | [A]                | $4.0 \times 10^{-7}$  |
| m.14915       | 4.52                         | KOG0953    | Mitochondrial RNA helicase SUV3, DEAD-box superfamily                | [A]                | $4.0 \times 10^{-32}$ |
| m.29694       | 4.51                         | KOG0335    | ATP-dependent RNA helicase                                           | [A]                | $3.0 \times 10^{-6}$  |
| m.58671       | 4.42                         | KOG0701    | dsRNA-specific nuclease Dicer and related ribonucleases              | [A]                | $1.0 \times 10^{-6}$  |
| m.58664       | 4.36                         | KOG0701    | dsRNA-specific nuclease Dicer and related ribonucleases              | [A]                | $5.0 \times 10^{-8}$  |
| m.57190       | 4.33                         | KOG0920    | ATP-dependent RNA helicase A                                         | [A]                | $3.0 \times 10^{-35}$ |
| m.21079       | 4.29                         | KOG0106    | Alternative splicing factor SRp55/B52/SRp75 (RRM superfamily)        | [A]                | $1.0 \times 10^{-7}$  |
| m.51740       | 4.20                         | KOG0922    | DEAH-box RNA helicase                                                | [A]                | $1.0 \times 10^{-9}$  |
| m.10895       | 4.09                         | KOG4768    | Mitochondrial mRNA maturase                                          | [A]                | $1.0 \times 10^{-9}$  |
| m.50245       | 3.35                         | KOG1895    | mRNA cleavage and polyadenylation factor II complex, subunit PTA1    | [A]                | $3.0 \times 10^{-12}$ |

Table S2. Cont.

| Transcript ID            | Log <sub>2</sub> fold change | KOG number | Description                                                                                            | KOG classification | E value                |
|--------------------------|------------------------------|------------|--------------------------------------------------------------------------------------------------------|--------------------|------------------------|
| m.12812                  | 2.78                         | KOG2202    | U2 snRNP splicing factor, small subunit, and related proteins                                          | [A]                | $4.0 \times 10^{-9}$   |
| m.48327                  | -4.20                        | KOG0331    | ATP-dependent RNA helicase                                                                             | [A]                | $4.0 \times 10^{-6}$   |
| m.44747                  | -4.29                        | KOG0920    | ATP-dependent RNA helicase A                                                                           | [A]                | $2.0 \times 10^{-6}$   |
| m.44746                  | -4.33                        | KOG0920    | ATP-dependent RNA helicase A                                                                           | [A]                | $2.0 \times 10^{-6}$   |
| m.58224                  | -4.39                        | KOG0988    | RNA-directed RNA polymerase QDE-1 required for posttranscriptional gene silencing and RNA interference | [A]                | $5.0 \times 10^{-6}$   |
| m.47203                  | -4.43                        | KOG0120    | Splicing factor U2AF, large subunit (RRM superfamily)                                                  | [A]                | $8.0 \times 10^{-8}$   |
| m.48680                  | -4.44                        | KOG4211    | Splicing factor hnRNP-F and related RNA-binding proteins                                               | [A]                | $1.0 \times 10^{-20}$  |
| m.15544                  | -4.51                        | KOG4205    | RNA-binding protein musashi/mRNA cleavage and polyadenylation factor I complex, subunit HRP1           | [A]                | $1.0 \times 10^{-5}$   |
| m.14916                  | -4.52                        | KOG0953    | Mitochondrial RNA helicase SUV3, DEAD-box superfamily                                                  | [A]                | $4.0 \times 10^{-32}$  |
| m.10894                  | -4.64                        | KOG4768    | Mitochondrial mRNA maturase                                                                            | [A]                | $1.0 \times 10^{-9}$   |
| m.38075                  | -4.74                        | KOG0108    | mRNA cleavage and polyadenylation factor I complex, subunit RNA15                                      | [A]                | $9.0 \times 10^{-6}$   |
| m.57417                  | -4.81                        | KOG0007    | Splicing factor 3a, subunit 1                                                                          | [A]                | $8.0 \times 10^{-7}$   |
| m.58566                  | -5.02                        | KOG1137    | mRNA cleavage and polyadenylation factor II complex, BRR5 (CPSF subunit)                               | [A]                | $1.0 \times 10^{-110}$ |
| m.38310                  | -5.36                        | KOG2636    | Splicing factor 3a, subunit 3                                                                          | [A]                | $2.0 \times 10^{-10}$  |
| m.24433                  | -5.54                        | KOG0343    | RNA Helicase                                                                                           | [A]                | $9.0 \times 10^{-6}$   |
| m.59844                  | -5.66                        | KOG1070    | rRNA processing protein Rrp5                                                                           | [A]                | $1.0 \times 10^{-9}$   |
| m.28491                  | -6.00                        | KOG0839    | RNA Methylase, SpoU family                                                                             | [A]                | $4.0 \times 10^{-62}$  |
| m.28471                  | 4.75                         | KOG2044    | 5'-3' exonuclease HKE1/RAT1                                                                            | [LA]               | $9.0 \times 10^{-8}$   |
| m.56286                  | -4.20                        | KOG2044    | 5'-3' exonuclease HKE1/RAT1                                                                            | [LA]               | $9.0 \times 10^{-11}$  |
| m.25310                  | 4.03                         | KOG1902    | Putative signal transduction protein involved in RNA splicing                                          | [TA]               | $3.0 \times 10^{-8}$   |
| <b>[K] Transcription</b> |                              |            |                                                                                                        |                    |                        |
| m.57710                  | 5.59                         | KOG1513    | Nuclear helicase MOP-3/SNO (DEAD-box superfamily)                                                      | [KT]               | $1.0 \times 10^{-81}$  |
| m.57714                  | 5.35                         | KOG1513    | Nuclear helicase MOP-3/SNO (DEAD-box superfamily)                                                      | [KT]               | $2.0 \times 10^{-7}$   |
| m.57712                  | 5.00                         | KOG1513    | Nuclear helicase MOP-3/SNO (DEAD-box superfamily)                                                      | [KT]               | $2.0 \times 10^{-81}$  |
| m.57385                  | 6.64                         | KOG1831    | Negative regulator of transcription                                                                    | [K]                | $9.0 \times 10^{-31}$  |

Table S2. Cont.

| Transcript ID | Log <sub>2</sub> fold change | KOG number | Description                                                                             | KOG classification | E value                 |
|---------------|------------------------------|------------|-----------------------------------------------------------------------------------------|--------------------|-------------------------|
| m.57769       | 5.13                         | KOG1952    | Transcription factor NF-X1, contains NFX-type Zn <sup>2+</sup> -binding and R3H domains | [K]                | 2.0 × 10 <sup>-7</sup>  |
| m.56319       | 4.99                         | KOG0048    | Transcription factor, Myb superfamily                                                   | [K]                | 3.0 × 10 <sup>-6</sup>  |
| m.16149       | 4.89                         | KOG3227    | Calcium-responsive transcription coactivator                                            | [K]                | 1.0 × 10 <sup>-6</sup>  |
| m.14891       | 4.58                         | KOG0484    | Transcription factor PHOX2/ARIX, contains HOX domain                                    | [K]                | 9.0 × 10 <sup>-6</sup>  |
| m.60202       | 4.51                         | KOG4522    | RNA polymerase II transcription mediator                                                | [K]                | 4.0 × 10 <sup>-25</sup> |
| m.32248       | 4.39                         | KOG0048    | Transcription factor, Myb superfamily                                                   | [K]                | 1.0 × 10 <sup>-5</sup>  |
| m.59358       | 4.36                         | KOG1778    | CREB binding protein/P300 and related TAZ Zn-finger proteins                            | [K]                | 5.0 × 10 <sup>-15</sup> |
| m.22814       | 4.25                         | KOG1601    | GATA-4/5/6 transcription factors                                                        | [K]                | 6.0 × 10 <sup>-6</sup>  |
| m.34174       | 4.20                         | KOG1598    | Transcription initiation factor TFIIB, Brf1 subunit                                     | [K]                | 5.0 × 10 <sup>-28</sup> |
| m.57453       | 4.16                         | KOG1356    | Putative transcription factor 5qNCA, contains JmjC domain                               | [K]                | 6.0 × 10 <sup>-11</sup> |
| m.53446       | 4.15                         | KOG1913    | Regucalcin gene promoter region-related protein (RGPR)                                  | [K]                | 8.0 × 10 <sup>-29</sup> |
| m.22815       | 2.78                         | KOG1601    | GATA-4/5/6 transcription factors                                                        | [K]                | 9.0 × 10 <sup>-6</sup>  |
| m.20168       | 2.47                         | KOG1601    | GATA-4/5/6 transcription factors                                                        | [K]                | 2.0 × 10 <sup>-7</sup>  |
| m.12316       | -3.40                        | KOG2239    | Transcription factor containing NAC and TS-N domains                                    | [K]                | 3.0 × 10 <sup>-8</sup>  |
| m.56318       | -4.20                        | KOG0048    | Transcription factor, Myb superfamily                                                   | [K]                | 3.0 × 10 <sup>-6</sup>  |
| m.43112       | -4.22                        | KOG0528    | HMG-box transcription factor SOX5                                                       | [K]                | 9.0 × 10 <sup>-6</sup>  |
| m.57770       | -4.30                        | KOG1952    | Transcription factor NF-X1, contains NFX-type Zn <sup>2+</sup> -binding and R3H domains | [K]                | 2.0 × 10 <sup>-7</sup>  |
| m.26017       | -4.58                        | KOG1601    | GATA-4/5/6 transcription factors                                                        | [K]                | 1.0 × 10 <sup>-9</sup>  |
| m.2754        | -4.70                        | KOG1601    | GATA-4/5/6 transcription factors                                                        | [K]                | 9.0 × 10 <sup>-6</sup>  |
| m.9910        | -4.89                        | KOG1668    | Elongation factor 1 beta/delta chain                                                    | [K]                | 4.0 × 10 <sup>-7</sup>  |
| m.40477       | -5.00                        | KOG2039    | Transcriptional coactivator p100                                                        | [K]                | 5.0 × 10 <sup>-34</sup> |
| m.9912        | -5.09                        | KOG1668    | Elongation factor 1 beta/delta chain                                                    | [K]                | 4.0 × 10 <sup>-7</sup>  |
| m.22067       | -5.21                        | KOG1778    | CREB binding protein/P300 and related TAZ Zn-finger proteins                            | [K]                | 4.0 × 10 <sup>-6</sup>  |
| m.26018       | -5.33                        | KOG1601    | GATA-4/5/6 transcription factors                                                        | [K]                | 1.0 × 10 <sup>-9</sup>  |

Table S2. Cont.

| Transcript ID                             | Log <sub>2</sub> fold change | KOG number | Description                                                                                             | KOG classification | E value               |
|-------------------------------------------|------------------------------|------------|---------------------------------------------------------------------------------------------------------|--------------------|-----------------------|
| m.58254                                   | 5.21                         | KOG0973    | Histone transcription regulator HIRA, WD repeat superfamily                                             | [DK]               | $2.0 \times 10^{-8}$  |
| m.30185                                   | 6.90                         | KOG2633    | Hismacro and SEC14 domain-containing proteins                                                           | [BK]               | $4.0 \times 10^{-7}$  |
| m.42532                                   | 4.86                         | KOG0386    | Chromatin remodeling complex SWI/SNF, component SWI2 and related ATPases (DNA/RNA helicase superfamily) | [BK]               | $1.0 \times 10^{-12}$ |
| m.22726                                   | 4.52                         | KOG2626    | Histone H3 (Lys4) methyltransferase complex, subunit CPS60/ASH2/BRE2                                    | [BK]               | $5.0 \times 10^{-9}$  |
| m.59998                                   | -4.45                        | KOG0386    | Chromatin remodeling complex SWI/SNF, component SWI2 and related ATPases (DNA/RNA helicase superfamily) | [BK]               | $4.0 \times 10^{-27}$ |
| [L] Replication, recombination and repair |                              |            |                                                                                                         |                    |                       |
|                                           |                              |            | 5'-3' exonuclease                                                                                       |                    |                       |
| m.27619                                   | -4.90                        | KOG2045    | XRN1/KEM1/SEP1 involved in DNA strand exchange and mRNA turnover                                        | [LD]               | $2.0 \times 10^{-9}$  |
| m.28471                                   | 4.75                         | KOG2044    | 5'-3' exonuclease HKE1/RAT1                                                                             | [LA]               | $9.0 \times 10^{-8}$  |
| m.56286                                   | -4.20                        | KOG2044    | 5'-3' exonuclease HKE1/RAT1                                                                             | [LA]               | $9.0 \times 10^{-11}$ |
| m.17741                                   | 6.22                         | KOG1508    | DNA replication factor/protein phosphatase inhibitor SET/SPR-2                                          | [L]                | $2.0 \times 10^{-6}$  |
| m.60241                                   | 5.37                         | KOG0891    | DNA-dependent protein kinase                                                                            | [L]                | $2.0 \times 10^{-6}$  |
| m.22798                                   | 5.13                         | KOG0217    | Mismatch repair ATPase MSH6 (MutS family)                                                               | [L]                | $1.0 \times 10^{-6}$  |
| m.40148                                   | 5.04                         | KOG2179    | Nucleotide excision repair complex XPC-HR23B, subunit XPC/DPB11                                         | [L]                | $2.0 \times 10^{-28}$ |
| m.41495                                   | 4.86                         | KOG1978    | DNA mismatch repair protein—MLH2/PMS1/Pms2 family                                                       | [L]                | $9.0 \times 10^{-6}$  |
| m.48621                                   | 4.62                         | KOG1956    | DNA topoisomerase III alpha                                                                             | [L]                | $2.0 \times 10^{-13}$ |
| m.38736                                   | 4.52                         | KOG2310    | DNA repair exonuclease MRE11                                                                            | [L]                | $7.0 \times 10^{-12}$ |
| m.41493                                   | 4.38                         | KOG1978    | DNA mismatch repair protein—MLH2/PMS1/Pms2 family                                                       | [L]                | $9.0 \times 10^{-6}$  |
| m.8216                                    | 4.24                         | KOG0221    | Mismatch repair ATPase MSH5 (MutS family)                                                               | [L]                | $9.0 \times 10^{-6}$  |
| m.49196                                   | 4.17                         | KOG0250    | DNA repair protein RAD18 (SMC family protein)                                                           | [L]                | $5.0 \times 10^{-6}$  |
| m.18130                                   | 4.09                         | KOG1132    | Helicase of the DEAD superfamily                                                                        | [L]                | $4.0 \times 10^{-32}$ |
| m.41492                                   | -4.53                        | KOG1978    | DNA mismatch repair protein—MLH2/PMS1/Pms2 family                                                       | [L]                | $9.0 \times 10^{-6}$  |

Table S2. Cont.

| Transcript ID                        | Log <sub>2</sub> fold change | KOG number | Description                                                                                             | KOG classification | E value               |
|--------------------------------------|------------------------------|------------|---------------------------------------------------------------------------------------------------------|--------------------|-----------------------|
| m.49197                              | -4.75                        | KOG0250    | DNA repair protein RAD18 (SMC family protein)                                                           | [L]                | $5.0 \times 10^{-6}$  |
| m.60242                              | -5.02                        | KOG0891    | DNA-dependent protein kinase                                                                            | [L]                | $2.0 \times 10^{-6}$  |
| [B] Chromatin structure and dynamics |                              |            |                                                                                                         |                    |                       |
| m.30185                              | 6.90                         | KOG2633    | Hismacro and SEC14 domain-containing proteins<br>Chromatin remodeling complex                           | [BK]               | $4.0 \times 10^{-7}$  |
| m.42532                              | 4.86                         | KOG0386    | SWI/SNF, component SWI2 and related ATPases (DNA/RNA helicase superfamily)                              | [BK]               | $1.0 \times 10^{-12}$ |
| m.22726                              | 4.52                         | KOG2626    | Histone H3 (Lys4)<br>methyltransferase complex, subunit CPS60/ASH2/BRE2<br>Chromatin remodeling complex | [BK]               | $5.0 \times 10^{-9}$  |
| m.59998                              | -4.45                        | KOG0386    | SWI/SNF, component SWI2 and related ATPases (DNA/RNA helicase superfamily)                              | [BK]               | $4.0 \times 10^{-27}$ |
| m.35864                              | 4.48                         | KOG2266    | Chromatin-associated protein Dek and related proteins, contains SAP DNA binding domain                  | [B]                | $4.0 \times 10^{-9}$  |
| m.48936                              | 4.40                         | KOG1279    | Chromatin remodeling factor subunit and related transcription factors                                   | [B]                | $2.0 \times 10^{-14}$ |
| m.59774                              | 4.09                         | KOG0389    | SNF2 family DNA-dependent ATPase                                                                        | [B]                | $7.0 \times 10^{-6}$  |
| m.17815                              | -4.21                        | KOG1000    | Chromatin remodeling protein HARP/SMARCAL1, DEAD-box superfamily                                        | [B]                | $8.0 \times 10^{-7}$  |

**Table S3.** Primer sequences used for verification of differentially expressed transcripts between diploid and autotetraploid *P. fortunei*.

| <b>Transcript ID</b> | <b>5'-primer sequence</b> | <b>3'-primer sequence</b> |
|----------------------|---------------------------|---------------------------|
| m.30899              | TGGCTCCTCTCCTTACTATG      | AACAATCTGCGGCAATCC        |
| m.33871              | TCAGGCACTCTCCAAGTATC      | CGGCATATTTGAGGTGTTAGC     |
| m.54501              | GCCAATGACCCAACAATAGAAC    | CGAAGAGCATCAGCATAAGAAC    |
| m.32555              | ACCTGGGCAAGCAATCTC        | TCCACGGTGAACAAGTCC        |
| m.14097              | GGGCTTGCTGCTGGAATG        | CCAACAATAAGACCATAACAGTGC  |
| m.28729              | AAAGAGGGTATGGAAAGGAAAGAC  | ATTGGTGTGGCAGGATTAGC      |
| m.8309               | GGTGTGGTGGTGGTGTGG        | AAGTCCTTTGTTGTGGTGTGG     |
| m.32221              | ATGACCCTGTTAGCAATCTCTTAG  | GCCTCAACCACCTCCTTCG       |
| m.41758              | ATTCTAATGCCATCGCTACTAC    | CGTGCCACATTCAATCCAG       |
| m.43095              | AGCATTTCGGAGGAGCCAAG      | GCGGAGTAGGTTTCGGTGAC      |
| m.37547              | CTATGCCTGGAATGATGG        | AAGTGAATGTGGAATGCC        |
| m.37548              | GAGAGGATTAAGGCTGTGAG      | GGTCTAGGAGTCTGATTGTC      |
| m.50116              | TGATGGTTGGATATTCTGACTC    | GATTGAATGGCAAGATATGTAGG   |
| m.50118              | TCAACAGAGCAAGGAGAAATGG    | GCCGTAAGGTAGCAAGAAGC      |
| m.56286              | CCACCAGAAGGAGTTACAATG     | GGTAAATCTGCTCTGAACAATAG   |
| m.59998              | AGGAAGAAGAAAGGAACCGTATAG  | GCCAAGCCTGAACACCATC       |
| m.17815              | GCATTTCTCTTGAGTAGC        | CTCTTCTTCTGTCCATCC        |
| m.48610              | GAGGAGAATGGAGTGGCAGAG     | AAGCGAAGATGGGAGTGTGG      |
| m.38370              | CGTCAGATGCCTTACCAC        | CCGCTCACTCACTTCAAG        |
| m.58566              | TCACCAGGAAGGACACTAAG      | CAAGGACATACCAACAAATACC    |
| m.24433              | ATGAAGTGCTCCAAGTTG        | GCCTGCTGAATAACATCG        |
| m.12316              | AGACACAGGCTGCTCAAC        | CATCAACCTCCTCCTCTCC       |

**Figure S1.** Gene Ontology Classification for complete transcripts of *P. fortunei* transcriptome.

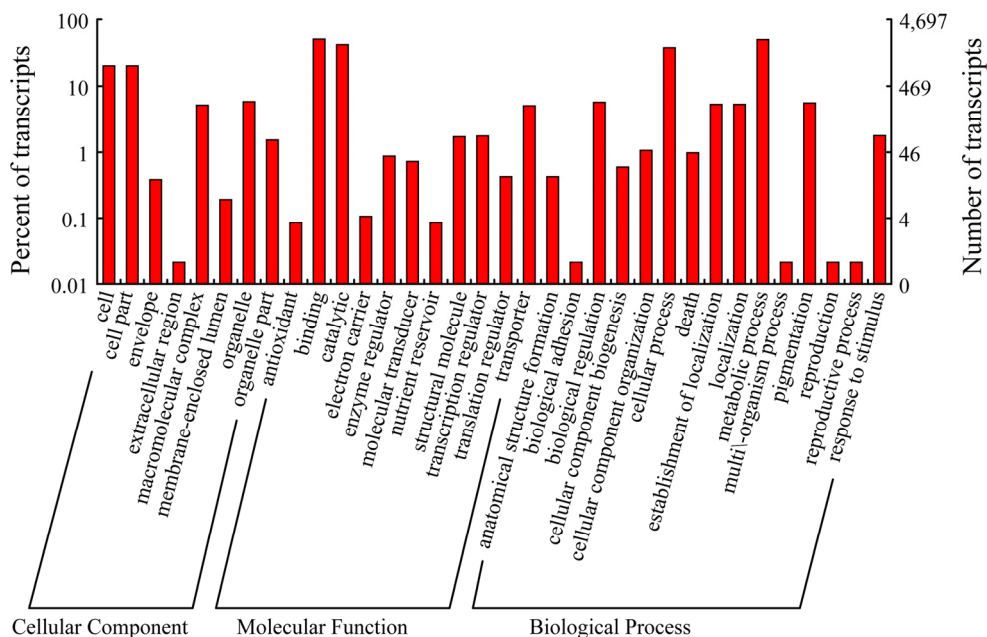

**Figure S2.** Histogram presentation of KOG classification for complete transcripts of *P. fortunei* transcriptome.

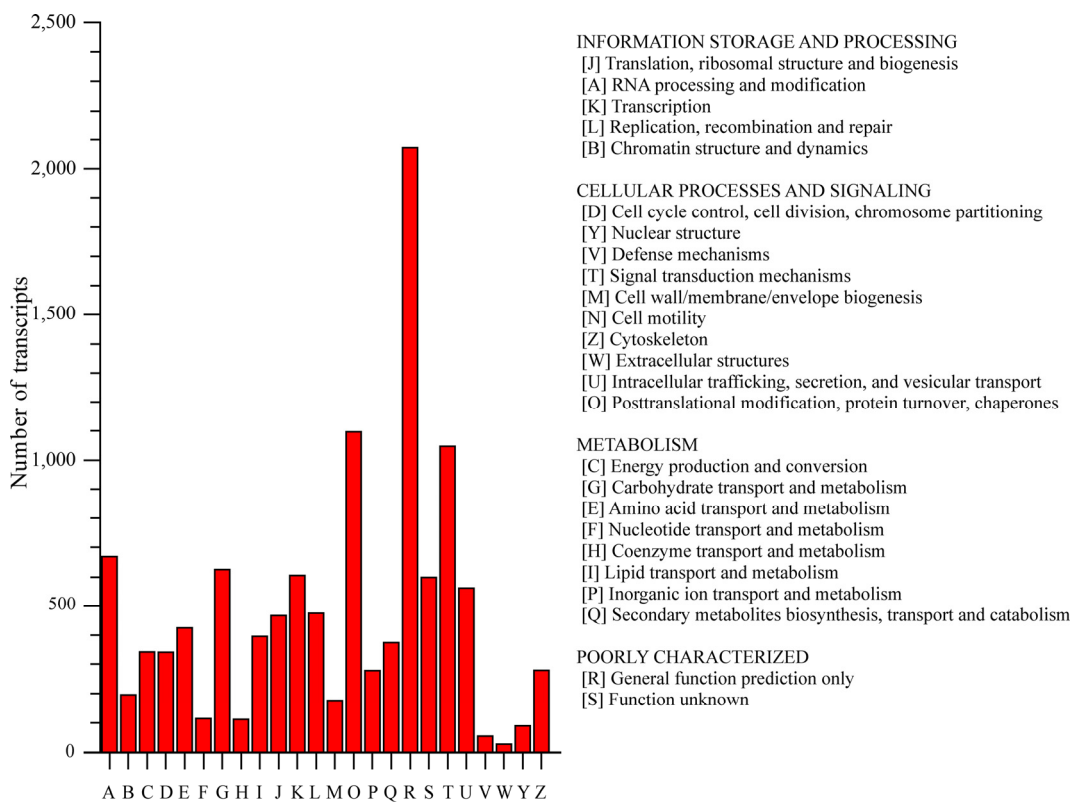



**Figure S3.** KOG functional categorization of differentially expressed transcripts of *P. fortunei* transcriptome.

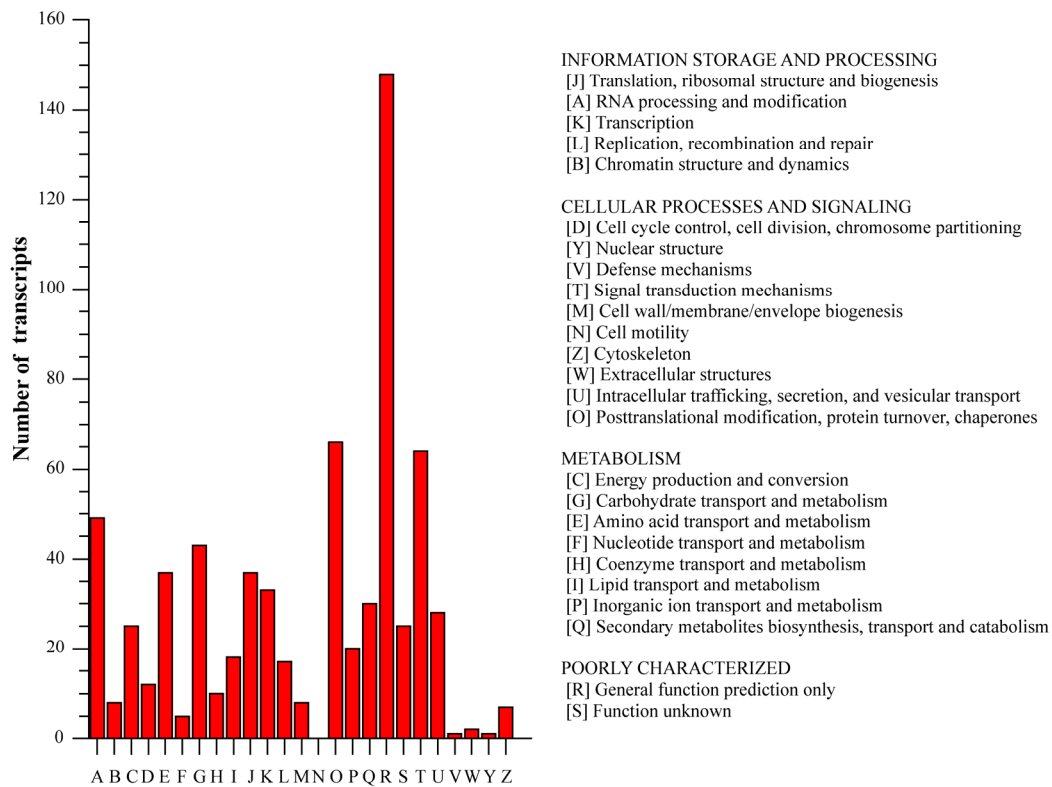

## 1. The options of Bowtie used in this study

The command line: bowtie2 -x ref.fasta -1 1.fq -2 2.fq -S output.sam

Options:

Input:

-q  
 -s/--skip <none>  
 -u/--upto <no limit>  
 -5/--trim5 <0>  
 -3/--trim3 <0>  
 --phred33

Presets: Same as:

For --end-to-end:

--sensitive -D 15 -R 2 -N 0 -L 22 -i S,1,1.15

Alignment:

-N <0>  
 -L <22>  
 -i <S,1,1.15>  
 --n-ceil <L,0,0.15>  
 --dpad <15>

--gbar <4>  
--ignore-quals off  
--nofw off  
--norc off  
--end-to-end on  
--local off  
Scoring:  
--ma <0>  
--mp <6>  
--np <1>  
--rdg <5>, <3>  
--rfg <5>, <3>  
--score-min <L,-0.6,-0.6>  
Reporting: (default)  
Effort:  
-D <15>  
-R <2>  
Paired-end:  
-I/--minins <0>  
-X/--maxins <500>  
--fr  
--no-mixed  
--no-discordant  
--no-dovetail  
--no-contain  
--no-overlap  
Output:  
-t/--time  
--quiet  
--met-file <path> off  
--met-stderr off  
--met <1>  
--no-head  
--no-sq  
--rg-id <text>  
--rg <text>  
--omit-sec-seq  
Performance:  
-o/--offrate <int>  
-p/--threads <1>  
--reorder  
--mm

Other:

--qc-filter  
--seed <0>  
--non-deterministic  
--version  
-h/--help

## **2. The options of RSEM used in this study**

The command line: perl run\_RSEM\_align\_n\_estimate.pl --transcripts ref.fasta --seqType fq --left 1.fq --right 2.fq

Options:

--prefix <RSEM>  
--SS\_lib\_type <string> FR  
--no\_group\_by\_component  
--thread\_count 4  
--debug

© 2014 by the authors; licensee MDPI, Basel, Switzerland. This article is an open access article distributed under the terms and conditions of the Creative Commons Attribution license (<http://creativecommons.org/licenses/by/3.0/>).
